# Supplementary material for: Treatment of Stress Urinary Incontinence with Muscle Stem Cells and Stem Cell Components: Chances, Challenges and Future Prospects
Source: Int J Mol Sci. 2021 Apr 12;22(8):3981. doi: 10.3390/ijms22083981 (PMC8069473; doi:10.3390/ijms22083981)
Supplement: Supplementary file 1 [file ijms-22-03981-s001.xlsx]

## Sheet: Table 1 -  Summary of clinical 
First author	Year of publication	Study design	Number of patients	Gender	Treatment groups	Stem cell type (autologous)	Origin muscle	Dosage of cells in millions Size of biopsy in cm or mg	Route of application	Postoperative treatment	Primary outcome	Secondary outcome	Follow-up	Comments and main results (statistical significant)	Complications	Quality of evidence very low (+) low (++) moderate (+++) high (++++)
Mitterberger et al.	2008	prospective	20	female	Tx	MBs	Biceps	10 - 30 mio	transurethral	PFMT, EMS (transvaginal)	ISP	I-QOL, TUUS, UDS, MUCP	2y	16 patients cured, 2 patients improved, 2 patient lost to follow-up. ISP, QoL and MUCP improved.	none	(++)
Sèbe et al.	2011	prospective, randomized	12	female	Tx	MPCs	Deltoid	10, 25, 50 mio	endoscopic	none	UF	UDS, UPP, PVR, PT, BD, CQ, MUCP	1y	12 patients without voiding difficulties. No PVR increase, 3 patients dry according PT, 7 improved on PT, 9 patients with better CQ, 2 patients with worse CQ, 1 patient with higher MUCP at 12m.	3 patients with UTI	(+++)
Blaganje et al.	2012	prospective	38	female	Tx	MBs	Upper arm	1 - 50 mio	transurethral	ES (transvaginal)	SAE	FBVST, BD, PGI-I, I-QOL	6w	No SAE, 1 patient lost to follow-up. 29 patients with negative FBVST, median incontinence episodes in BD decreased, median I-QOL improved, 5 patients cured and 29 improved according PGI-I, no correlation of cell dosage to results.	2 patients with UTI	(++)
Gerullis et al.	2012	prospective	222	male	Tx	MDSCs	Deltoid	1.2 - 19.2 mio	endoscopic	none	Question on incontinence status (not validated)	Time until effect onset, AEs	1y	26 patients continent, 94 patients improved, 102 patients with persistent incontinence. Clinical improvement in average after 5m, mean harvest to transplantion 61d	4 patients with catheterism due to hematuria, 11 patients with UTI, 19 patients with worse UI (removal of stricture) Reversible minor AEs: 11x perineal pain, 6x epididymoorchitis, 5x urethritis, 4x fatigue syndrome	(+)
Carr et al.	2013	prospective, randomized	38	female	Tx	MDSCs	Quadriceps femoris	1, 2, 4, 8, 16 mio = low dose 32, 64, 128 mio = high dose	periurethral, endoscopic assisted	second injection of same dose if requested after 3m	SAE, AEs	PT, BD, IIQ-7, UDI-6	18m	23x low dose (20x repeated injection), 15x high dose (12x repeated injection). 33 patients completed, 4 withdrawals, 1 lost to follow-up. Reduction in mean pad weight and stress leak frequency, increase in number of patients with negative pad test, mean IIQ-7 improved in high dose with 2 injections, mean UDI-6 scores higher.	no SAE, 3x pain at biopsy site, 4x pain at injection site UTI, UR, dysuria, frequency, pelvic/abdominal pain and worsening UI in 2 patients each.	(+++)
Peters et al.	2014	prospective, randomized	80	female	Tx	MDSCs	Quadriceps femoris	10, 50, 100, 200 mio	transurethral or periurethral, endoscopic assisted	none	SAE, AEs	PT, BD, IIQ-7, UDI-6	1y	16x 10mio, 16x 50mio, 24x 100mio, 24x 200 mio. 1 patient with no final product, 74 patients completed follow-up, 5x withdrawal, 1x lost to follow-up. Fewer stress leaks, reduction in mean pad weight in 200 mio group, no difference between peri- and transurethral approach, tendency to better functional results with higher dosage, improved UDI-6 and IIQ-7 among all groups	4x biopsy wound hematoma, 2x dizziness, 1x postop bleeding, 7x dysuria, 4x pelvic or abdominal pain, 3x vulvovaginal pruritus, 2x transient hematuria, 2x urgency	(+++)
Yiou et al.	2013	prospective	10 (5 + 5)	both	Tx	MS	Gracilis	5 x 1 x 0.2 cm	open	none	AEs, PVR, UF, pain on VAS	UDS, PT, CQ, ICIQ-UI-SF, UCLA-PCI, MUCP	1y	Overall PT and ICIQ-UI-SF decreased (women > men), CQ improved in all women, 4 women with improved PT, 4 men with additional surgical interventions, overall increase in MUCP 2-fold	no AEs, incomplete bladder emptying resolved spontaneously	(++)
Gräs et al.	2014	prospective	35	female	Tx	MSMT	Quadriceps femoris	350 - 1300 mg	periurethral	none	BD	ICIQ-UI-SF, AEs, UF, PVR, UPP	1y	20x uncSUI and 15x cSUI. 15 patients with uncSUI improved or cured according ICIQ-UI-SF, 8 unaffected, 1 worsened. 9 patients with cSUI improved or cured, 6 with no improvement.Positive correlation of biopsy weight and percentage of improvement on ICIQ-UI-SF	none	(++)
Stangel-Wojcikiewicz et al.	2014	prospective	16	female	Tx	MDSCs	Deltoid	0.6 - 25 Mio	transurethral, endoscopic assisted	none	Safety, AEs	G-QOL, PFUS, UDS, UPP, CLPP, VLPP	8m (visit) 2y (telephone)	12 patients with improvement (75%), 8x continent, 4x improved, 4x no change according G-QOL. All outcome groups with higher MUCP after 8m (larger increase in continent and improved). Time from menarche to menopause longer in "continent" and "improved" than in "no change" group. Improvement began 5m after injection.	none	(++)
Sharifiaghdas et al.	2016	prospective	10	female	Tx	MDSCs	Deltoid or Quadriceps femoris	38.6 Mio (mean) 1 x 1 x 1 cm	transurethral or endoscopic	none	CSS, PT	BD, IIQ-7, UDS, MUCP, UF	3y	Nota bene: 10 female patients with ISD and epispadias (=cSUI). All patients reported improvement at first postoperative visit (1m). 3 patients cured after 1y. 4x improvement, three unresponsive. IIQ-7 lower at 12m follow-up, PT and CSS better at 1y and 3y, MUCP higher at 1y.	2x UTI	(++)
Jankowski et al.	2018	prospective randomized double-blind placebo-controlled multicenter	143	female	Tx, Cx, Px, Sx	MDSCs	Quadriceps femoris	150 Mio	transurethral	none	BD and PT (composite)	UDI-6, IIQ-7, I-QOL, G-QOL, ISI, SAEs, AEs, PVR	1y-2y	Nota bene: Females with SUI or stress-predominant mixed UI. 2 different Tx and Px groups: Single and repeated injection (after 6m). Trial halted at interims analysis due to high placebo effect. Subjects unblinded after 12m. 93x Tx and 50x Px. 40x with second Tx injection, 23 with second Px injection. 2 patients lost to follow-up. 49x patients with Px reveiced unblinded injection at 12m. Composite…	UTI, Dysuria, Pollakisuria, nausea, pain at injection site (2.2-12.9% affected).	(++++)
Abbreviations: Treatment (Tx), Control (Cx), Placebo (Px), Sham (Sx), Muscle derived stem cells (MDSCs), Muscle progenitor cells (MPCs), Myoblasts (MBs), Muscle strip (MS), Minced skeletal muscle tissue (MSMT), Pelvic floor muscle therapy (PFMT), Electromagnetic stimulation (EMS), Electrical stimulation (ES), Incontinence Score Protocol (ISP), Uroflometry (UF),
Adverse events (AEs), Severe adverse event (SAE), Visual analogue scale (VAS), Cough stress test (CSS), Incontinence Quality of Life (I-QOL), Transurethral ultrasound (TUUS), Urodynamic study (UDS), Maximal urethral closure pressure (MUCP), Urethral pressure profilometry (UPP), Post-void residual (PVR), Pad test (PT), Bladder diary (BD), CONTILIFE questionnaire (CQ),
Global Impression of Improvement scale (PGI-I), Fixed bladder volume stress test (FBVST), Incontinence Impact Questionnaire short form (IIQ-7), Urogenital Distress Inventory short form (UDI-6), International Consultation on Incontinence Questionnaire Short Form (ICIQ-UI-SF), University of California Los Angeles Prostate Cancer Index (UCLA-PCI),
Gaudenz/Global Quality of Life Questionnaire (G-QOL), Pelvic Floor Ultrasound (PFUS), Cough leak point pressure (CLPP), Valsalva leak point pressure (VLPP), Severity index for urinary incontinence in women (ISI), Weeks (w), Months (m), Years (y), Uncomplicated SUI (uncSUI), Complicated SUI (cSUI), Intrinsic sphincter deficiency (ISD), Urinary Tract Infection (UTI),
Urinary incontinence (UI), Urinary retention (UR).
